# Supplementary material
Source: Research Square preprint supplement (doi:10.21203/rs.3.rs-10164525/v1)
Supplement: Supplementary file 1 [file 471b98eea23c24108e7c137b.pdf]

Supplementary Figures:

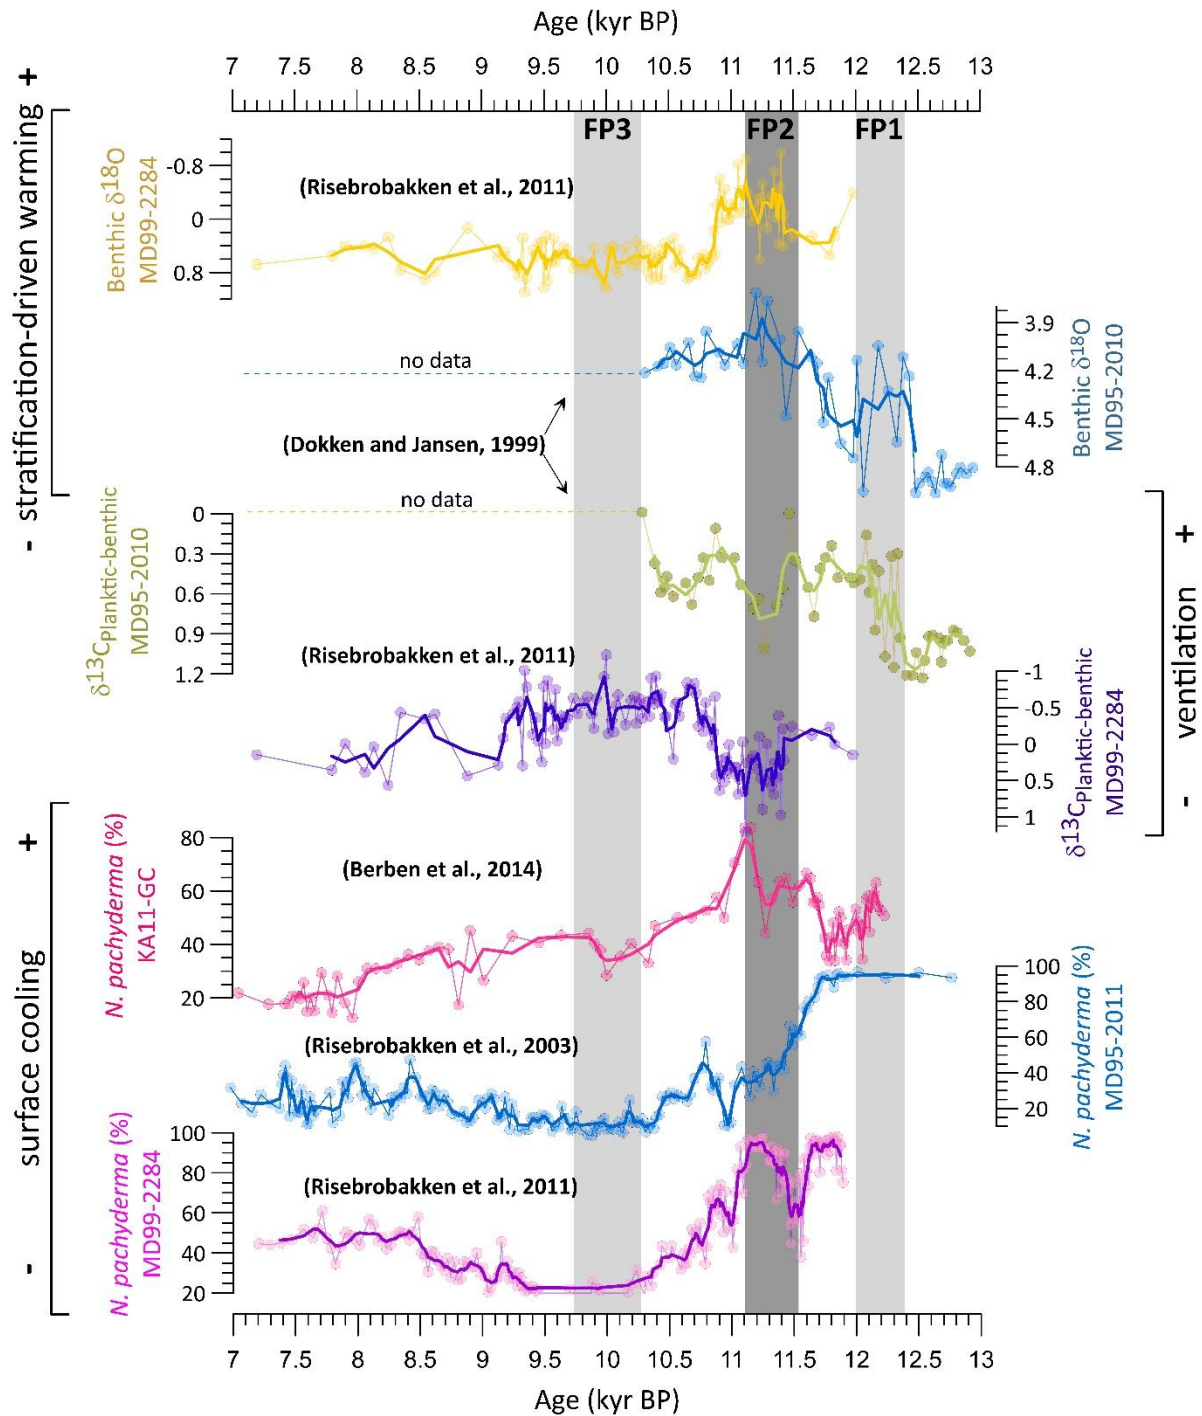

**S1:** Time-series of  $\delta^{13}C$  values of planktic–benthic foraminifera, and the percentage of *Neogloboquadrina pachyderma* in cores KA11-GC <sup>1</sup>, MD95-2011 <sup>2</sup>, and MD99-2284 <sup>3</sup>. Blue vertical bars indicate freshwater events FP1–FP3 identified in this study, with the darker bar marking the Preboreal Oscillation -related event.

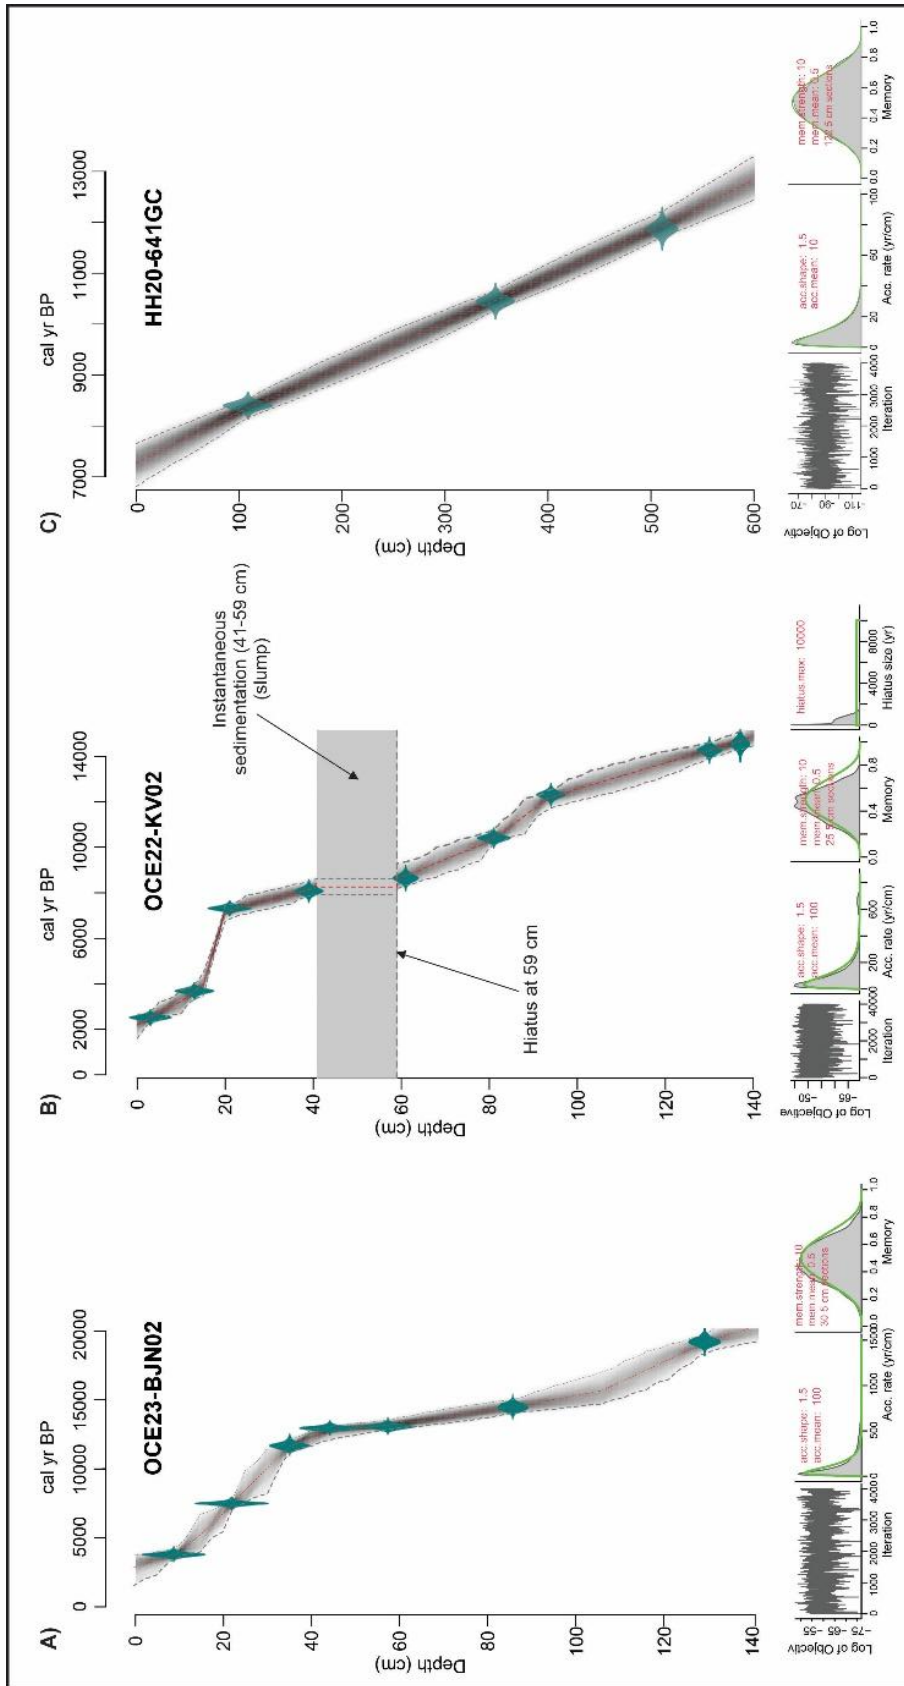

**S2:** Age-depth models of sediment cores OCE2023-BJN02-GC, OCE2022-KV02-GC, and HH20-641GC. The grey horizontal bar indicates a reworked sediment layer attributed to redeposition caused by the Storegga tsunami event <sup>4</sup>.

## Reference

1. Berben, S. M. P., Husum, K., Cabedo-Sanz, P. & Belt, S. T. Holocene sub-centennial evolution of Atlantic water inflow and sea ice distribution in the western Barents Sea. *Climate of the Past* **10**, 181–198 <https://doi.org/10.5194/cp-10-181-2014> (2014).
2. Risebrobakken, B., Jansen, E., Andersson, C., Mjelde, E. & Hevrøy, K. A high-resolution study of Holocene paleoclimatic and paleoceanographic changes in the Nordic Seas. *Paleoceanography* **18**, <https://doi.org/10.1029/2002pa000764> (2003).
3. Risebrobakken, B., *et al.* Early Holocene temperature variability in the Nordic Seas: The role of oceanic heat advection versus changes in orbital forcing. *Paleoceanography* **26**, <https://doi.org/10.1029/2011pa002117> (2011).
4. Devendra, D., *et al.* Expanding the footprint of the Storegga tsunami through new evidence from Arctic marine sediments. *Scientific Reports* **15**, <https://doi.org/10.1038/s41598-025-10811-7> (2025).
