# Supplementary material
Source: Research Square preprint supplement (doi:10.21203/rs.3.rs-10164525/v1)
Supplement: Supplementary file 1 [file 741a4e0d39e6441a1a486267.xlsx]

## Sheet: BJN02_data
Layer-alkenone	Age	%C37:4	UK37	SST	Layer-sterol	Age_meltwaterpBO	brassicasterol	24-methylenecholesterol	dinosterol	sum C37	Layer-isotope	BJN_Age stable iso	d13C (‰, vs VPDB)	d18O (‰, vs VPDB)	Layer-foram	Foram age	%C. neoteretis	%E. clavatum
25	8.286	8.31636	0.346837	4.94461	25	8.286	0.0728494	0.0133565	0.151265	63.304	23	7.789	-1.63883	3.51004	21	7.244	24.7897	3.54139
26	8.622	23.055	0.241268	-0.0824985	26	8.622	0.1209	0.046769	0.200345	53.6591	26	8.622	-1.53983	3.30699	23	7.789	34.4086	4.52745
27	9.018	22.6107	0.351951	5.18813	27	9.018	0.104018	0.0228952	0.154224	95.718	27	9.018	-1.72575	3.40179	25	8.286	20.5128	4.68864
28	9.403	30.1642	0.243368	0.0175182	28	9.403	0.135139	0.0500248	0.196544	92.0779	28	9.403	-1.93753	3.19145	26	8.622	20.394	17.1495
29	9.775	4.7261	0.31718	3.53236	29	9.775	0.150903	0.0919504	0.299175	52.4165	29	9.775	-1.27238	3.59139	27	9.018	15.3276	21.2608
30	10.128	35.9968	0.244761	0.083848	30	10.128	0.156955	0.088194	0.290545	87.4176	30	10.128	-2.15924	3.26847	28	9.403	21.5569	13.8922
31	10.457	19.7206	0.23544	-0.360022	31	10.457	0.182204	0.113364	0.374505	101.499	31	10.457	-1.69692	3.64965	29	9.775	18.1303	22.2852
32	10.789	8.13095	0.318927	3.61558	32	10.789	0.115367	0.0854841	0.287616	67.4197	32	10.789	-1.8391	3.39093	30	10.128	17.3458	17.9409
33	11.117	25.0534	0.279871	1.75577	33	11.117	0.118083	0.0866956	0.265572	76.1293	33	11.117	-1.38075	2.27405	31	10.457	28.1346	3.58879
34	11.452	56.3707	0.429113	8.86253	34	11.452	0.107481	0.0428788	0.197021	59.7748	34	11.452	-1.78044	3.34056	32	10.789	19.2192	18.2583
36	11.931	10.0396	0.295693	2.50919	36	11.931	0.168903	0.13769	0.36638	100.899	35	11.8	-1.70885	3.85703	33	11.117	15.5095	23.0839
37	12.067	20.2358	0.320146	3.67361	37	12.067	0.156865	0.0976585	0.319689	86.7585	36	11.931	-1.7347	3.54695	34	11.452	16.0087	23.364
39	12.346	27.5479	0.252893	0.471103	38	12.208	0.164481	0.105827	0.29351	70.1484	37	12.067	-1.98028	1.98768	35	11.8	21.6034	24.3946
					39	12.346	0.165234	0.094805	0.290963	58.1997	38	12.208	-1.87986	3.25465	36	11.931	16.4684	30.0091
					40	12.481	0.161271	0.0954656	0.277494	50.9747	39	12.346	-1.73967	3.4561	37	12.067	18.3575	21.5781
											40	12.481	-1.65218	3.32575	38	12.208	10.0448	22.9536
											41	12.564	-1.9942	1.84449	39	12.346	16.1146	24.709
											43	12.74	-1.53161	3.38864	40	12.481	16.6243	28.838
											45	12.917	-1.92858	2.7925	41	12.564	19.5584	24.6057
											47	12.979	-1.62096	3.34719	43	12.74	22.5399	16.148
															45	12.917	25	16
															47	12.979	22.9426	18.6201

## Sheet: KV02_data
Layer-alkenone	Age	%C37:4	UK37	SST(Fillipova)	IP25	PbIP25	Layer-sterol	Age	brassicasterol	dinosterol	24-met cholesterol	sum 37	Layer-isotope	Age stable iso	d13C (‰, vs VPDB)	d18O (‰, vs VPDB)		Layer-foram	Age_foram	%C. neoteretis	%E. clavatum
21	7.283	14.9316	0.198986	-2.09589	0.965136	0.548452	21	7.283	0.279242	0.0741115	0.211447	20.2765	20	7.229	-1.75076	3.5568		20	7.229	17.0616	17.3324
25	7.494	13.3683	0.312578	3.31322	1.26994	0.568185	25	7.494	0.33917	0.0508804	0.218234	19.2221	21	7.283	-1.33125	3.65775		21	7.283	10.4651	20.6977
33	7.873	12.8128	0.315822	3.46772	0.980194	0.506495	33	7.873	0.335625	0.0464555	0.228879	16.2301	23	7.396	-1.23065	3.27464		23	7.396	13.8934	10.6624
41	8.265	15.5469	0.329107	4.10032	0.982957	0.500595	41	8.265	0.34461	0.0463491	0.233754	19.089	25	7.494	-1.8024	3.69833		25	7.494	5.07246	8.69565
45	Reworked layer by Storegga tsunami	14.4242	0.308048	3.09752	1.25531	0.567186	45	Reworked layer by Storegga tsunami	0.33663	0.0455056	0.251255	17.6564	27	7.586	-1.43285	3.41422		27	7.586	7.68	9.6
49		16.2946	0.304669	2.93662	1.6172	0.607307	49		0.367482	0.0655387	0.233982	12.1245	31	7.776	-1.69183	3.42808		29	7.685	6.79612	4.85437
55		8.86107	0.322656	3.79314	1.62178	0.595224	55		0.387572	0.0712416	0.18027	14.2883	33	7.873	-0.957723	3.05883		31	7.776	7.03125	13.6719
61		12.7782	0.340006	4.61933	1.31722	0.525725	61		0.417596	0.0509278	0.254908	17.809	35	7.966	-1.87212	3.74387		33	7.873	11.6959	7.01754
63	8.931	14.1698	0.221798	-1.00963	0.577344	0.340833	63	8.931	0.392388	0.0842254	0.219695	10.5868	37	8.063	-1.57429	3.59538		35	7.966	16.7742	15.1613
65	9.097	8.33645	0.340447	4.64032	0.65642	0.360288	65	9.097	0.409584	0.0728744	0.249002	14.5979	39	8.159	-1.29141	3.63993		37	8.063	8.73016	28.5714
69	9.405	11.0893	0.360702	5.60485	0.566152	0.367547	69	9.405	0.342353	0.0397452	0.204144	17.885	Reworked layer by Storegga tsunami					39	8.159	13.6095	10.9467
71	9.572	N/A	0.349887	5.08988	0.861978	0.507697	71	9.572	0.293732	0.0630415	0.174719	12.0386	61	8.782	-0.944774	3.51426		41	8.265	14	6
73	9.746	11.8263	0.341344	4.68307	0.865788	0.50138	73	9.746	0.30258	0.0310512	0.144242	12.4942	63	8.931	-2.01755	3.6528		42	Reworked layer by Storegga tsunami	25.5814	9.30233
75	9.901	22.312	0.330641	4.1734	1.13229	0.536658	75	9.901	0.343548	0.0782458	0.170401	15.4257	67	9.253	-2.00759	3.54291		43		10.3175	6.34921
76	9.985	21.6033	0.318462	3.59342	1.03803	0.45876	76	9.985	0.430369	0.0806947	0.17767	20.8427	77	10.073	-2.31239	3.01824		44		22.5806	6.45161
77	10.073	13.8093	0.335655	4.41214	0.96756	0.417484	77	10.073	0.474431	0.045749	0.239439	8.91675	81	10.443	-2.1062	3.29146		45		4.7619	4.7619
78	10.155	19.964	0.310552	3.21674	1.0081	0.526548	78	10.155	0.318544	0.06476	0.188493	12.6082	83	10.643	-1.98966	3.94582		47		6.34921	3.96825
79	10.245	13.7903	0.253495	0.499744	1.05168	0.529203	79	10.245	0.328792	0.0883842	0.213698	16.4191	85	10.957	-2.30442	3.07863		49		11.6667	5
81	10.443	14.2126	0.407769	7.84615	0.776112	0.426226	81	10.443	0.367157	0.0462739	0.188414	11.491	87	11.252	-2.16098	3.10535		51		2.74725	8.79121
83	10.643	14.8236	0.347019	4.95327	0.731524	0.462242	83	10.643	0.29907	0.0605152	0.172298	14.2861	88	11.396	-1.44779	3.03309		53		4.13793	15.5172
85	10.957	9.52381	0.419029	8.38232	0.453179	0.306634	85	10.957	0.360114	0.0331164	0.168452	25.9267	89	11.541	-2.58631	3.05883		55		1.96078	14.7059
86	11.11	20.2336	0.31946	3.64097	0.567768	0.420587	86	11.11	0.274871	0.055969	0.13	14.9127	91	11.836	-1.76255	3.22613		56		6.25	13.5417
87	11.252	28.2581	0.29021	2.24809	0.742584	0.491122	87	11.252	0.270394	0.0522287	0.137624	11.0861	103	12.744	-1.80538	3.87257		57		8.69565	10.8696
88	11.396	46.9828	0.198597	-2.11441	0.706723	0.518042	88	11.396	0.231058	0.0524323	0.117144	12.9135	107	12.982	-2.01854	3.65577		59		19.469	5.30973
89	11.541	12.8052	0.331455	4.21215	0.614843	0.371812	89	11.541	0.365054	0.0392877	0.159434	39.8751						61	8.782	12.0805	8.05369
91	11.836	11.0016	0.276683	1.60396	1.26005	0.466541	91	11.836	0.506319	0.0818196	0.261069	11.9501						63	8.931	6.99301	10.4895
93	12.155	21.4286	0.315758	3.46465	1.08721	0.489759	93	12.155	0.398047	0.0671956	0.194854	18.682						65	9.097	4.34783	8.69565
95	12.286	18.923	0.208183	-1.65796	1.02519	0.513279	95	12.286	0.341633	0.0961512	0.208003	10.5392						67	9.253	6.08696	15.6522
97	12.4	12.896	0.312714	3.31972	0.894128	0.447889	97	12.4	0.387331	0.0616181	0.268104	12.5872						69	9.405	13.5135	18.9189
99	12.51	16.5579	0.353065	5.24118	0.751896	0.47187	99	12.51	0.295735	0.0583611	0.276664	10.7906						73	9.746	8.88889	13.3333
101	12.63	13.443	0.363626	5.74411	0.739683	0.389845	101	12.63	0.406837	0.0449619	0.225885	22.2547						77	10.073	2.53165	32.9114
103	12.744	66.3428	0.109281		0.724339	0.442066	103	12.744	0.321265	0.0654207	0.161456	13.674						81	10.443	6.14754	20.4918
105	12.868	12.6685	0.369179	6.00852	0.577511	0.367424	105	12.868	0.349407	0.039733	0.160712	13.1588						83	10.643	1.17647	17.6471
107	12.982	17.0609	0.228933	-0.66987	0.706956	0.49286	107	12.982	0.255637	0.0514928	0.140174	15.8133						85	10.957	3.67647	20.5882
																		86	11.11	2.10526	34.7368
																		87	11.252	0	28.481
																		88	11.396	0.429185	27.0386
																		89	11.541	9.30233	20.9302
																		90	11.685	8.57143	25.7143
																		91	11.836	3.125	18.125
																		93	12.155	6.25	31.25
																		95	12.286	1.72414	13.7931
																		97	12.4	5.68182	5.68182
																		101	12.63	0	25
																		103	12.744	3.38983	33.0508
																		105	12.868	7.69231	26.9231
																		107	12.982	4.40252	22.6415

## Sheet: HH20-641GC
Age	18O
10.941	3.1989
10.941	2.91685
10.987	1.98078
11.03	1.6
11.079	2.1
11.079	0.9
11.123	2.81704
11.258	1.5
11.303	2.6
11.303	0.960148
11.35	1.42691
11.485	2.9
11.529	2.93414
11.575	2.968
11.621	1.37513
11.665	3.13486
11.683	2.75458
11.709	3.04584
11.752	2.97353
11.77	4
11.77	3.82472
11.797	4.1
11.797	3.9
11.797	4.01011
11.824	4
11.824	4.03601
11.877	4.05952
11.877	3.9
11.894	4.08553
11.894	3.8
11.894	4
11.953	4.04919
11.953	3.8
12.001	4.03202
12.001	4
12.001	4.1
12.051	3.46221
12.092	4
12.092	4.05042
12.122	4.2
12.122	4.09326
12.122	4
12.164	4.2478
12.194	3.73203
12.194	3.49831
12.224	3.67611
12.256	3.44984
12.286	3.34855
12.329	3.8568
12.329	4
12.38	3.46287
12.38	3.7
12.481	3.9
12.481	4.01901
12.529	3.58628
12.58	3.8
12.63	3.46337
12.679	3.7
12.73	4.4
12.73	4.49108
12.779	3.5
12.779	4.02533
